# Supplementary material for: Complexes of magnetic nanospheres with amphiprotic polymer–Zn systems for the selective isolation of lactoferrin
Source: Royal Society of Chemistry journal article supplement (doi:10.1039/c8tb01341a), 2018-01-01
Supplement: c8tb01341a1.pdf [file c8tb01341a1.pdf]

# Electronic Supplementary Information

## **Complexes of Magnetic Nanospheres with Amphiprotic Polymer- Zn Systems for Selective Isolation of Lactoferrin**

*Zhiyong Guo, Dandan Zhang, Shunfen Song, Yang Shu, Xuwei Chen\*, Jianhua*

*Wang\**

*Research Center for Analytical Sciences, Northeastern University, Box 332, Shenyang  
110819, China*

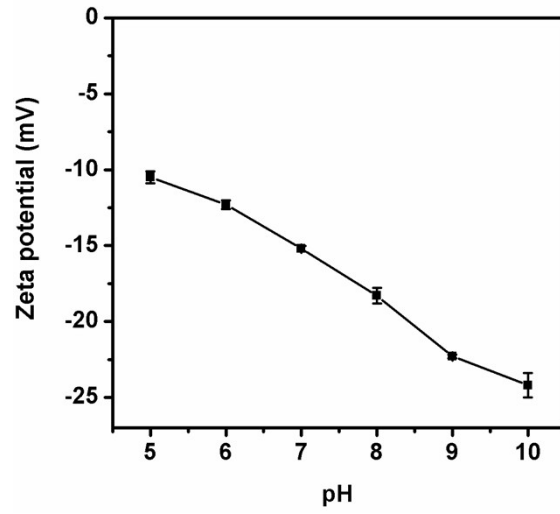

Figure S1. Zeta potentials of the  $\text{Fe}_3\text{O}_4@$ PCL- CMC-Zn complex nanospheres at pH 5-10.

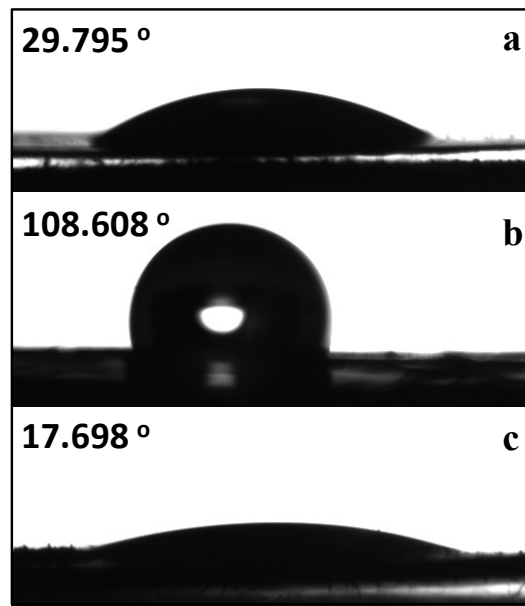

Figure S2. Contact angles of  $\text{Fe}_3\text{O}_4$  NPs (a),  $\text{Fe}_3\text{O}_4@$ PCL nanospheres (b) and  $\text{Fe}_3\text{O}_4@$  PCL-CMC-Zn complex nanospheres (c).

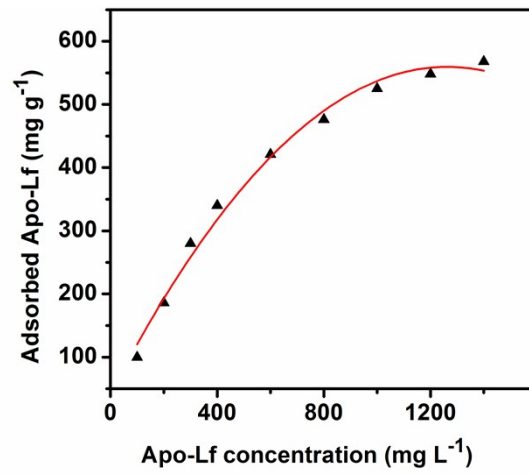

Figure S3. The adsorption isotherm of apo-Lf on Fe<sub>3</sub>O<sub>4</sub>@ PCL-CMC-Zn complex nanospheres. Protein solution: 50-700 mg L<sup>-1</sup>, pH 9; adsorption time: 10 min; the mass of nanospheres: 0.5 mg.

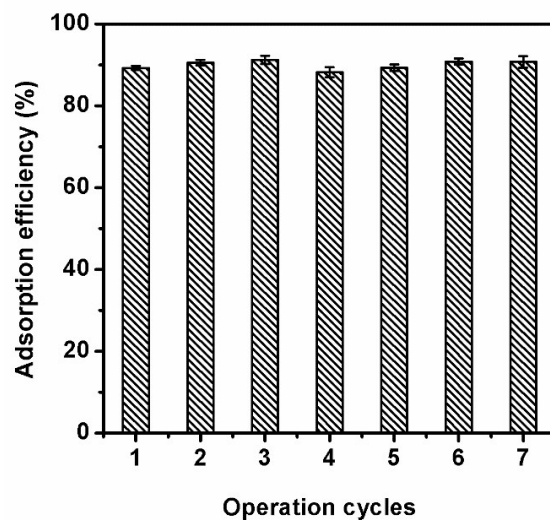

Figure S4. The reusability of Fe<sub>3</sub>O<sub>4</sub>@ PCL-CMC-Zn complex nanospheres for the circulation of adsorption and desorption of apo-Lf. Protein solution: 1.0 mL, 100 mg L<sup>-1</sup>, pH 9; adsorption time: 10 min; magnetic nanospheres: 1.0 mg.

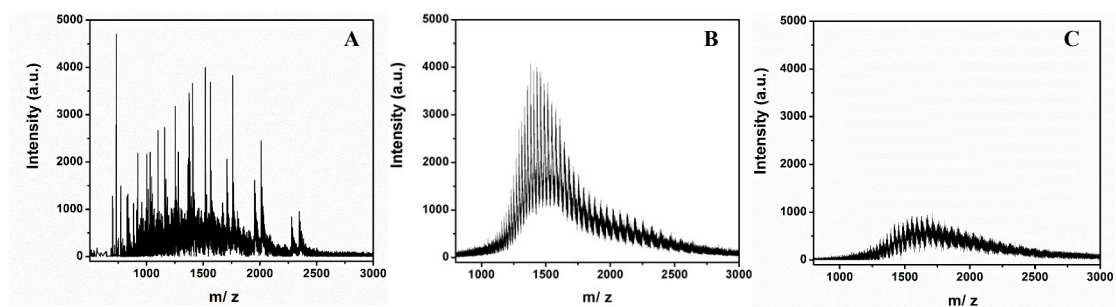

Figure S5. QTOF MS assay results: A: 10-fold diluted human colostrum whey sample without pretreatment; B: 10-fold diluted human colostrum whey sample after pretreatment with the  $\text{Fe}_3\text{O}_4@\text{PCL-CMC-Zn}$  complex nanospheres and recovery with  $\text{FeCl}_3$ ; C: apo-Lf standard solution ( $100 \text{ mg L}^{-1}$ ) after pretreatment with the  $\text{Fe}_3\text{O}_4@\text{PCL-CMC-Zn}$  complex nanospheres and recovery with  $\text{FeCl}_3$ .

Table S1. The comparison of adsorption capacities for lactoferrin with various adsorbents.

| Adsorbents                                                           | Adsorption capacity (mg g <sup>-1</sup> ) | Reference |
|----------------------------------------------------------------------|-------------------------------------------|-----------|
| Lactoferrin MIPs                                                     | 179.9                                     | [32]      |
| Hydroxyapatite nanocrystals                                          | 112.5                                     | [35]      |
| Supermacroporous continuous cryogel                                  | 308.8                                     | [36]      |
| Con A-bound Fe <sub>3</sub> O <sub>4</sub> MNPs                      | 59.2                                      | [37]      |
| Fe <sub>3</sub> O <sub>4</sub> @PCL-CMC-Zn <sup>2+</sup> nanospheres | 615.3                                     | this work |
